# Supplementary material for: Investigation of New Psychoactive Substances (NPS), Other Illicit Drugs, and Drug-Related Compounds in a Taiwanese Wastewater Sample Using High-Resolution Mass-Spectrometry-Based Targeted and Suspect Screening
Source: MDPI journal article supplement (doi:10.3390/molecules28135040), 2023-06-28
Supplement: s1 [file s1]

## **Supporting Materials**

### **Investigation of New Psychoactive Substances (NPS), Other Illicit Drugs, and Drug-Related Compounds in a Taiwanese Wastewater Sample Using High-Resolution Mass-Spectrometry-Based Targeted and Suspect Screening**

Yuan-Chih Chen<sup>1</sup>, Jen-Yi Hsu<sup>1</sup>, Chih-Wei Chang<sup>1</sup>, Pin-Yu Chen<sup>1</sup>, Yung-Chieh Lin<sup>1</sup>, I-Lin Hsu<sup>2</sup>, Chiau-Jun Chu<sup>2</sup>, Yen-Ping Lin<sup>2</sup> and Pao-Chi Liao<sup>1,3,\*</sup>

1 Department of Environmental and Occupational Health, College of Medicine, National Cheng Kung University, Tainan 704, Taiwan

2 Public Health Bureau, Tainan City Government, Tainan 704, Taiwan

3 Department of Food Safety/Hygiene and Risk Management, College of Medicine, National Cheng Kung University, Tainan 704, Taiwan

\*Correspondence:

Dr. Pao-Chi Liao

Department of Environmental and Occupational Health

National Cheng Kung University College of Medicine

138 Sheng-Li Road, Tainan 70428, Taiwan

TEL: 886-6-2353535 ext 5566, FAX: 886-6-2743748

E-mail: [liaopc@mail.ncku.edu.tw](mailto:liaopc@mail.ncku.edu.tw)

**Table S1. 92 identified substances based on suspect screening.**

| Compound name                   | Molecular formula                                               | Theoretical $m/z$ ( $[M+H]^+$ ) | Measured $m/z$ ( $[M-H]^+$ ) | Mass error (ppm) | MS/MS similarity scores | Database |
|---------------------------------|-----------------------------------------------------------------|---------------------------------|------------------------------|------------------|-------------------------|----------|
| Paracetamol                     | C <sub>8</sub> H <sub>9</sub> NO <sub>2</sub>                   | 152.0706                        | 152.0703                     | -2.0             | 0.97                    | mzCloud  |
| Ephedrine                       | C <sub>10</sub> H <sub>15</sub> NO                              | 166.1226                        | 166.1225                     | -0.8             | 0.93                    | mzCloud  |
| 11-ketotestosterone             | C <sub>19</sub> H <sub>26</sub> O <sub>3</sub>                  | 303.1955                        | 303.1949                     | -1.9             | 0.88                    | mzCloud  |
| Dextrorphan                     | C <sub>17</sub> H <sub>23</sub> NO                              | 258.1852                        | 258.1849                     | -1.3             | 0.88                    | mzCloud  |
| 1,4-Androstadiene-3,17-dione    | C <sub>19</sub> H <sub>24</sub> O <sub>2</sub>                  | 285.1849                        | 285.1845                     | -1.4             | 0.87                    | mzCloud  |
| Tramadol                        | C <sub>16</sub> H <sub>25</sub> NO <sub>2</sub>                 | 264.1958                        | 264.1956                     | -0.8             | 0.86                    | mzCloud  |
| Levorphanol                     | C <sub>17</sub> H <sub>23</sub> NO                              | 258.1852                        | 258.1848                     | -1.7             | 0.86                    | mzCloud  |
| Testosterone propionate         | C <sub>22</sub> H <sub>32</sub> O <sub>3</sub>                  | 345.2424                        | 345.2420                     | -1.2             | 0.85                    | mzCloud  |
| Hydromorphone                   | C <sub>17</sub> H <sub>19</sub> NO <sub>3</sub>                 | 286.1438                        | 286.1433                     | -1.6             | 0.83                    | mzCloud  |
| Phenethylamine                  | C <sub>8</sub> H <sub>11</sub> N                                | 122.0964                        | 122.0965                     | 0.6              | 0.82                    | mzCloud  |
| Anthranilic acid                | C <sub>7</sub> H <sub>7</sub> NO <sub>2</sub>                   | 138.0550                        | 138.0549                     | -0.4             | 0.82                    | mzCloud  |
| N-Methyl-2-phenylpropan-1-amine | C <sub>10</sub> H <sub>15</sub> N                               | 150.1277                        | 150.1278                     | 0.5              | 0.82                    | mzCloud  |
| 5alpha-Androstan-3,6,17-trione  | C <sub>19</sub> H <sub>26</sub> O <sub>3</sub>                  | 303.1955                        | 303.1949                     | -1.9             | 0.81                    | mzCloud  |
| 6beta-Hydromorphol              | C <sub>17</sub> H <sub>21</sub> NO <sub>3</sub>                 | 288.1594                        | 288.1590                     | -1.5             | 0.81                    | mzCloud  |
| 1,3-Dimethylbutylamine          | C <sub>6</sub> H <sub>15</sub> N                                | 102.1277                        | 102.1277                     | -0.3             | 0.80                    | mzCloud  |
| Diphenhydramine                 | C <sub>17</sub> H <sub>21</sub> NO                              | 256.1696                        | 256.1692                     | -1.5             | 0.80                    | mzCloud  |
| N-Methyl-2-Al                   | C <sub>10</sub> H <sub>13</sub> N                               | 148.1121                        | 148.1120                     | -0.5             | 0.78                    | mzCloud  |
| Formestane                      | C <sub>19</sub> H <sub>26</sub> O <sub>3</sub>                  | 303.1955                        | 303.1949                     | -1.9             | 0.78                    | mzCloud  |
| Dihydromorphone                 | C <sub>17</sub> H <sub>21</sub> NO <sub>3</sub>                 | 288.1594                        | 288.1590                     | -1.5             | 0.78                    | mzCloud  |
| Tapentadol                      | C <sub>14</sub> H <sub>23</sub> NO                              | 222.1852                        | 222.1847                     | -2.4             | 0.76                    | mzCloud  |
| 4-Methyl-N,N-dimethylcathinone  | C <sub>12</sub> H <sub>17</sub> NO                              | 192.1383                        | 192.1381                     | -1.0             | 0.75                    | mzCloud  |
| Testosterone cypionate          | C <sub>27</sub> H <sub>40</sub> O <sub>3</sub>                  | 413.3050                        | 413.3042                     | -2.0             | 0.74                    | mzCloud  |
| Methenolone                     | C <sub>20</sub> H <sub>30</sub> O <sub>2</sub>                  | 303.2319                        | 303.2314                     | -1.5             | 0.74                    | mzCloud  |
| MDPV                            | C <sub>16</sub> H <sub>21</sub> NO <sub>3</sub>                 | 276.1594                        | 276.1591                     | -1.2             | 0.74                    | mzCloud  |
| (-)-Caryophyllene oxide         | C <sub>15</sub> H <sub>24</sub> O                               | 221.1900                        | 221.1899                     | -0.4             | 0.73                    | mzCloud  |
| MEAI                            | C <sub>10</sub> H <sub>13</sub> NO                              | 164.1070                        | 164.1068                     | -1.2             | 0.72                    | mzCloud  |
| Bufotenin                       | C <sub>12</sub> H <sub>16</sub> N <sub>2</sub> O                | 205.1335                        | 205.1335                     | -0.2             | 0.70                    | mzCloud  |
| 5-AEDB                          | C <sub>10</sub> H <sub>13</sub> NO                              | 164.1070                        | 164.1068                     | -1.2             | 0.70                    | mzCloud  |
| Nicotine                        | C <sub>10</sub> H <sub>14</sub> N <sub>2</sub>                  | 163.1230                        | 163.1227                     | -0.7             | 0.97                    | MoNA     |
| Cyclohexylamine                 | C <sub>6</sub> H <sub>13</sub> N                                | 100.1121                        | 100.1120                     | 0.1              | 0.96                    | MoNA     |
| Cimetidine                      | C <sub>10</sub> H <sub>16</sub> N <sub>6</sub> S                | 253.1230                        | 253.1224                     | -1.3             | 0.95                    | MoNA     |
| Phenylacetaldehyde              | C <sub>8</sub> H <sub>8</sub> O                                 | 121.0648                        | 121.0649                     | 1.8              | 0.95                    | MoNA     |
| 4-Methyl-5-thiazoleethanol      | C <sub>6</sub> H <sub>9</sub> NOS                               | 144.0478                        | 144.0475                     | -0.9             | 0.94                    | MoNA     |
| Carbamazepine                   | C <sub>15</sub> H <sub>12</sub> N <sub>2</sub> O                | 237.1023                        | 237.1020                     | 0.0              | 0.94                    | MoNA     |
| Atenolol                        | C <sub>14</sub> H <sub>22</sub> N <sub>2</sub> O <sub>3</sub>   | 267.1703                        | 267.1700                     | -0.2             | 0.94                    | MoNA     |
| Trimethoprim                    | C <sub>14</sub> H <sub>18</sub> N <sub>4</sub> O <sub>3</sub>   | 291.1452                        | 291.1446                     | -0.9             | 0.94                    | MoNA     |
| Sulfapyridine                   | C <sub>11</sub> H <sub>11</sub> N <sub>3</sub> O <sub>2</sub> S | 250.0645                        | 250.0643                     | 0.3              | 0.94                    | MoNA     |
| Progesterone                    | C <sub>21</sub> H <sub>30</sub> O <sub>2</sub>                  | 315.2319                        | 315.2314                     | -0.4             | 0.94                    | MoNA     |
| Amantadine                      | C <sub>10</sub> H <sub>17</sub> N                               | 152.1434                        | 152.1432                     | -0.2             | 0.93                    | MoNA     |
| Salicylamide                    | C <sub>7</sub> H <sub>7</sub> NO <sub>2</sub>                   | 138.0550                        | 138.0548                     | -0.2             | 0.93                    | MoNA     |
| Bisoprolol                      | C <sub>18</sub> H <sub>31</sub> NO <sub>4</sub>                 | 326.2326                        | 326.2320                     | -0.8             | 0.93                    | MoNA     |
| Caffeine                        | C <sub>8</sub> H <sub>10</sub> N <sub>4</sub> O <sub>2</sub>    | 195.0877                        | 195.0873                     | -0.8             | 0.93                    | MoNA     |
| 4-Androstene-3,17-dione         | C <sub>19</sub> H <sub>26</sub> O <sub>2</sub>                  | 287.2006                        | 287.2002                     | -0.2             | 0.93                    | MoNA     |
| Methocarbamol                   | C <sub>11</sub> H <sub>15</sub> NO <sub>5</sub>                 | 242.1023                        | 242.1021                     | 0.2              | 0.92                    | MoNA     |
| Levetiracetam                   | C <sub>8</sub> H <sub>14</sub> N <sub>2</sub> O <sub>2</sub>    | 171.1128                        | 171.1125                     | -0.8             | 0.92                    | MoNA     |
| Pilocarpine                     | C <sub>11</sub> H <sub>16</sub> N <sub>2</sub> O <sub>2</sub>   | 209.1285                        | 209.1284                     | 0.7              | 0.92                    | MoNA     |

|                                |                                                                                |          |          |      |      |      |
|--------------------------------|--------------------------------------------------------------------------------|----------|----------|------|------|------|
| Theobromine                    | C <sub>7</sub> H <sub>8</sub> N <sub>4</sub> O <sub>2</sub>                    | 181.0720 | 181.0717 | -0.7 | 0.91 | MoNA |
| THEOPHYLLINE                   | C <sub>7</sub> H <sub>8</sub> N <sub>4</sub> O <sub>2</sub>                    | 181.0720 | 181.0717 | -0.7 | 0.91 | MoNA |
| Ethambutol                     | C <sub>10</sub> H <sub>24</sub> N <sub>2</sub> O <sub>2</sub>                  | 205.1911 | 205.1909 | 0.2  | 0.91 | MoNA |
| Dextromethorphan               | C <sub>18</sub> H <sub>25</sub> NO                                             | 272.2009 | 272.2005 | -0.4 | 0.91 | MoNA |
| Lidocaine                      | C <sub>14</sub> H <sub>22</sub> N <sub>2</sub> O                               | 235.1805 | 235.1802 | -0.2 | 0.91 | MoNA |
| N-Methylephedrine              | C <sub>11</sub> H <sub>17</sub> NO                                             | 180.1383 | 180.1382 | 0.5  | 0.90 | MoNA |
| Celecoxib                      | C <sub>17</sub> H <sub>14</sub> F <sub>3</sub> N <sub>3</sub> O <sub>2</sub> S | 382.0832 | 382.0826 | -0.4 | 0.90 | MoNA |
| Piperine                       | C <sub>17</sub> H <sub>19</sub> NO <sub>3</sub>                                | 286.1438 | 286.1433 | -0.6 | 0.90 | MoNA |
| Androsta-1,4-Dien-3,17-Dione   | C <sub>19</sub> H <sub>24</sub> O <sub>2</sub>                                 | 285.1849 | 285.1844 | -0.7 | 0.90 | MoNA |
| Phenylalanine                  | C <sub>9</sub> H <sub>11</sub> NO <sub>2</sub>                                 | 166.0863 | 166.0861 | 0.0  | 0.90 | MoNA |
| Adenine                        | C <sub>5</sub> H <sub>5</sub> N <sub>5</sub>                                   | 136.0618 | 136.0618 | 1.1  | 0.90 | MoNA |
| Flecainide                     | C <sub>17</sub> H <sub>20</sub> F <sub>6</sub> N <sub>2</sub> O <sub>3</sub>   | 415.1451 | 415.1442 | -1.1 | 0.89 | MoNA |
| Fexofenadine                   | C <sub>32</sub> H <sub>39</sub> NO <sub>4</sub>                                | 502.2952 | 502.2941 | -1.1 | 0.88 | MoNA |
| Propranolol                    | C <sub>16</sub> H <sub>21</sub> NO <sub>2</sub>                                | 260.1645 | 260.1642 | -0.2 | 0.88 | MoNA |
| Diethyl-phthalate              | C <sub>12</sub> H <sub>14</sub> O <sub>4</sub>                                 | 223.0965 | 223.0961 | -0.7 | 0.88 | MoNA |
| Acetaminophen                  | C <sub>8</sub> H <sub>9</sub> NO <sub>2</sub>                                  | 152.0706 | 152.0705 | 0.3  | 0.88 | MoNA |
| Citalopram                     | C <sub>20</sub> H <sub>21</sub> FN <sub>2</sub> O                              | 325.1711 | 325.1707 | -0.1 | 0.87 | MoNA |
| Hexylamine                     | C <sub>6</sub> H <sub>15</sub> N                                               | 102.1277 | 102.1277 | 0.6  | 0.85 | MoNA |
| Metronidazole                  | C <sub>6</sub> H <sub>9</sub> N <sub>3</sub> O <sub>3</sub>                    | 172.0717 | 172.0716 | 0.6  | 0.85 | MoNA |
| Hordenine                      | C <sub>10</sub> H <sub>15</sub> NO                                             | 166.1227 | 166.1226 | 0.7  | 0.85 | MoNA |
| 3'-Aminoacetophenone           | C <sub>8</sub> H <sub>9</sub> NO                                               | 136.0757 | 136.0757 | 1.0  | 0.84 | MoNA |
| Fluconazole                    | C <sub>13</sub> H <sub>12</sub> F <sub>2</sub> N <sub>6</sub> O                | 307.1114 | 307.1111 | 0.2  | 0.84 | MoNA |
| Cyclophosphamide               | C <sub>7</sub> H <sub>15</sub> Cl <sub>2</sub> N <sub>2</sub> O <sub>2</sub> P | 261.0321 | 261.0320 | 0.7  | 0.83 | MoNA |
| Phenylethanolamine             | C <sub>8</sub> H <sub>11</sub> NO                                              | 138.0914 | 138.0913 | 0.6  | 0.82 | MoNA |
| N-Methyl-2-pyrrolidone         | C <sub>5</sub> H <sub>9</sub> NO                                               | 100.0757 | 100.0756 | 0.0  | 0.82 | MoNA |
| Meperidine                     | C <sub>15</sub> H <sub>21</sub> NO <sub>2</sub>                                | 248.1645 | 248.1642 | -0.2 | 0.82 | MoNA |
| Harmol                         | C <sub>12</sub> H <sub>10</sub> N <sub>2</sub> O                               | 199.0866 | 199.0865 | 0.5  | 0.81 | MoNA |
| Tryptamine                     | C <sub>10</sub> H <sub>12</sub> N <sub>2</sub>                                 | 161.1073 | 161.1075 | 2.1  | 0.81 | MoNA |
| Nalidixic acid                 | C <sub>12</sub> H <sub>12</sub> N <sub>2</sub> O <sub>3</sub>                  | 233.0921 | 233.0919 | 0.3  | 0.81 | MoNA |
| Terbutaline                    | C <sub>12</sub> H <sub>19</sub> NO <sub>3</sub>                                | 226.1438 | 226.1434 | -0.6 | 0.79 | MoNA |
| Venlafaxine                    | C <sub>17</sub> H <sub>27</sub> NO <sub>2</sub>                                | 278.2115 | 278.2112 | 0.1  | 0.79 | MoNA |
| Alpha-pyrrolidinovalerophenone | C <sub>15</sub> H <sub>21</sub> NO                                             | 232.1696 | 232.1692 | -0.7 | 0.78 | MoNA |
| (R)-(-)-Phenylephrine          | C <sub>9</sub> H <sub>13</sub> NO <sub>2</sub>                                 | 168.1019 | 168.1019 | 0.9  | 0.76 | MoNA |
| Indole                         | C <sub>8</sub> H <sub>7</sub> N                                                | 118.0651 | 118.0651 | 0.7  | 0.76 | MoNA |
| Canrenone                      | C <sub>22</sub> H <sub>28</sub> O <sub>3</sub>                                 | 341.2111 | 341.2106 | -0.5 | 0.74 | MoNA |
| Thymol                         | C <sub>10</sub> H <sub>14</sub> O                                              | 151.1118 | 151.1117 | 0.7  | 0.73 | MoNA |
| Norgestrel                     | C <sub>21</sub> H <sub>28</sub> O <sub>2</sub>                                 | 313.2162 | 313.2157 | -0.6 | 0.73 | MoNA |
| Linoleic acid                  | C <sub>18</sub> H <sub>32</sub> O <sub>2</sub>                                 | 281.2475 | 281.2472 | -0.1 | 0.72 | MoNA |
| Phenelzine                     | C <sub>8</sub> H <sub>12</sub> N <sub>2</sub>                                  | 137.1073 | 137.1073 | 0.8  | 0.72 | MoNA |
| Betaxolol                      | C <sub>18</sub> H <sub>29</sub> NO <sub>3</sub>                                | 308.2220 | 308.2216 | -0.3 | 0.71 | MoNA |
| Phenacetin                     | C <sub>10</sub> H <sub>13</sub> NO <sub>2</sub>                                | 180.1019 | 180.1018 | 0.4  | 0.71 | MoNA |
| Thymidine                      | C <sub>10</sub> H <sub>14</sub> N <sub>2</sub> O <sub>5</sub>                  | 243.0976 | 243.0973 | 0.0  | 0.70 | MoNA |
| Benzoic acid                   | C <sub>7</sub> H <sub>6</sub> O <sub>2</sub>                                   | 121.0281 | 121.0284 | -2.5 | 0.90 | MoNA |
| 4-Chlorophenol                 | C <sub>6</sub> H <sub>5</sub> ClO                                              | 126.9943 | 126.9945 | -1.7 | 0.90 | MoNA |
| Salicylic acid                 | C <sub>7</sub> H <sub>6</sub> O <sub>3</sub>                                   | 137.0232 | 137.0233 | -0.9 | 0.80 | MoNA |
| Acetaminophen                  | C <sub>8</sub> H <sub>9</sub> NO <sub>2</sub>                                  | 150.0546 | 150.0550 | -2.4 | 0.92 | MoNA |

**Table S2. Information of 18 standards for high confidence identification.**

| Compound name           | Molecular formula                                               | Theoretical m/z<br>([M+H] <sup>+</sup> ) | Type of drugs     |
|-------------------------|-----------------------------------------------------------------|------------------------------------------|-------------------|
| Methamphetamine         | C <sub>10</sub> H <sub>15</sub> N                               | 150.1277                                 | Traditional drugs |
| Amphetamine             | C <sub>9</sub> H <sub>13</sub> N                                | 136.1121                                 | Traditional drugs |
| Ketamine                | C <sub>13</sub> H <sub>16</sub> CINO                            | 238.0993                                 | Traditional drugs |
| Norketamine             | C <sub>12</sub> H <sub>14</sub> CINO                            | 224.0837                                 | Traditional drugs |
| Morphine                | C <sub>17</sub> H <sub>19</sub> NO <sub>3</sub>                 | 286.1438                                 | Traditional drugs |
| Codeine                 | C <sub>18</sub> H <sub>21</sub> NO <sub>3</sub>                 | 300.1594                                 | Traditional drugs |
| THC <sup>1</sup>        | C <sub>21</sub> H <sub>30</sub> O <sub>2</sub>                  | 315.2319                                 | Traditional drugs |
| THC-COOH <sup>1</sup>   | C <sub>21</sub> H <sub>28</sub> O <sub>4</sub>                  | 345.2061                                 | Traditional drugs |
| MDMA <sup>1</sup>       | C <sub>11</sub> H <sub>15</sub> NO <sub>2</sub>                 | 194.1176                                 | Traditional drugs |
| Mephedrone              | C <sub>11</sub> H <sub>15</sub> NO                              | 178.1227                                 | Traditional drugs |
| Flunitrazepam           | C <sub>16</sub> H <sub>12</sub> FN <sub>3</sub> O <sub>3</sub>  | 314.0936                                 | Traditional drugs |
| 7-Aminoflunitrazepam    | C <sub>16</sub> H <sub>14</sub> FN <sub>3</sub> O               | 284.1194                                 | Traditional drugs |
| Nimetazepam             | C <sub>16</sub> H <sub>13</sub> N <sub>3</sub> O <sub>3</sub>   | 296.1030                                 | Traditional drugs |
| 7-Aminonimetazepam      | C <sub>16</sub> H <sub>15</sub> N <sub>3</sub> O                | 266.1288                                 | Traditional drugs |
| Zopiclone               | C <sub>17</sub> H <sub>17</sub> CIN <sub>6</sub> O <sub>3</sub> | 389.1124                                 | Traditional drugs |
| 4-Cl-α-PPP <sup>1</sup> | C <sub>13</sub> H <sub>16</sub> CINO                            | 238.0993                                 | NPS               |
| 4-F-α-PVP <sup>1</sup>  | C <sub>15</sub> H <sub>20</sub> FNO                             | 250.1602                                 | NPS               |
| JWH-249 <sup>1</sup>    | C <sub>21</sub> H <sub>22</sub> BrNO                            | 384.0958                                 | NPS               |

1. Names are abbreviated, full names are in section 5.1
